# Supplementary material for: Novel Strategies for Cancer Combat: Drug Combination Using Repurposed Drugs Induces Synergistic Growth Inhibition of MCF-7 Breast and HT-29 Colon Cancer Cells
Source: MDPI journal article supplement (doi:10.3390/cimb44100335), 2022-10-16
Supplement: s1 [file s1]

# Novel Strategies for Cancer Combat: Drug Combination using Repurposed Drugs Induces Synergistic Growth Inhibition of MCF-7 Breast and HT-29 Colon Cancer Cells

Diana Duarte <sup>1,2,3</sup>, Inês Guerreiro <sup>1</sup> and Nuno Vale <sup>1,3,4,\*</sup>

- <sup>1</sup> OncoPharma Research Group, Center for Health Technology and Services Research (CINTESIS), Rua Dr. Plácido da Costa, s/n, 4200-450 Porto, Portugal
  - <sup>2</sup> Faculty of Pharmacy, University of Porto, Rua Jorge Viterbo Ferreira, 228, 4050-313 Porto, Portugal
  - <sup>3</sup> Department of Community Medicine, Health Information and Decision (MEDCIDS), Faculty of Medicine, University of Porto, Rua Dr. Plácido da Costa, s/n, 4200-450 Porto, Portugal
  - <sup>4</sup> CINTESIS@RISE, Faculty of Medicine, University of Porto, Al. Prof. Hernâni Monteiro, 4200-319 Porto, Portugal
- \* Correspondence: nunovale@med.up.pt; Tel.: +351-220426537

## Supplementary Material

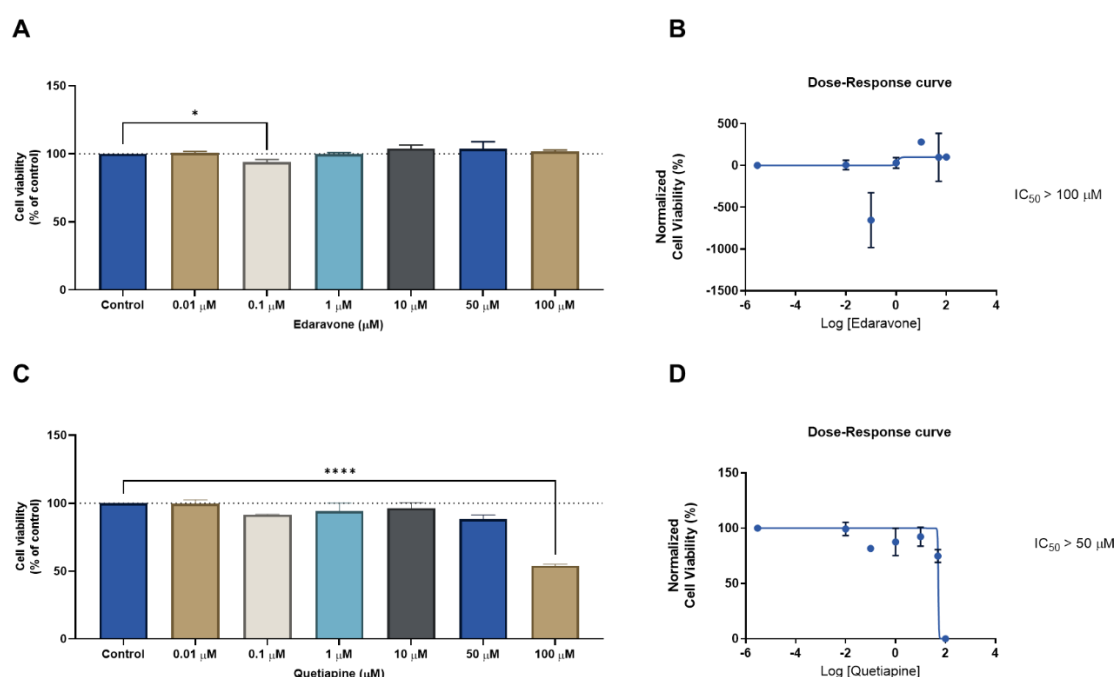

**Figure S1.** Cellular viability results of MCF-7 cells after treatment with the CNS drugs edaravone (top) and quetiapine (bottom). (A) MTT results and (B) dose-response curve of MCF-7 cells treated with edaravone. (C) MTT results and (D) dose-response curve of MCF-7 cells treated with quetiapine. Cells were incubated with increasing concentrations of each drug for 48 h and cell viability was evaluated using an MTT assay. Dose-response curves were obtained by normalization of cell viability results against the logarithm of the concentration of each drug. The  $IC_{50}$  value was determined using GraphPad. Experiments were performed three times independently ( $n = 3$ ). \* and \*\*\*\* indicate significant results at  $p < 0.05$  and  $p < 0.0001$ , respectively.

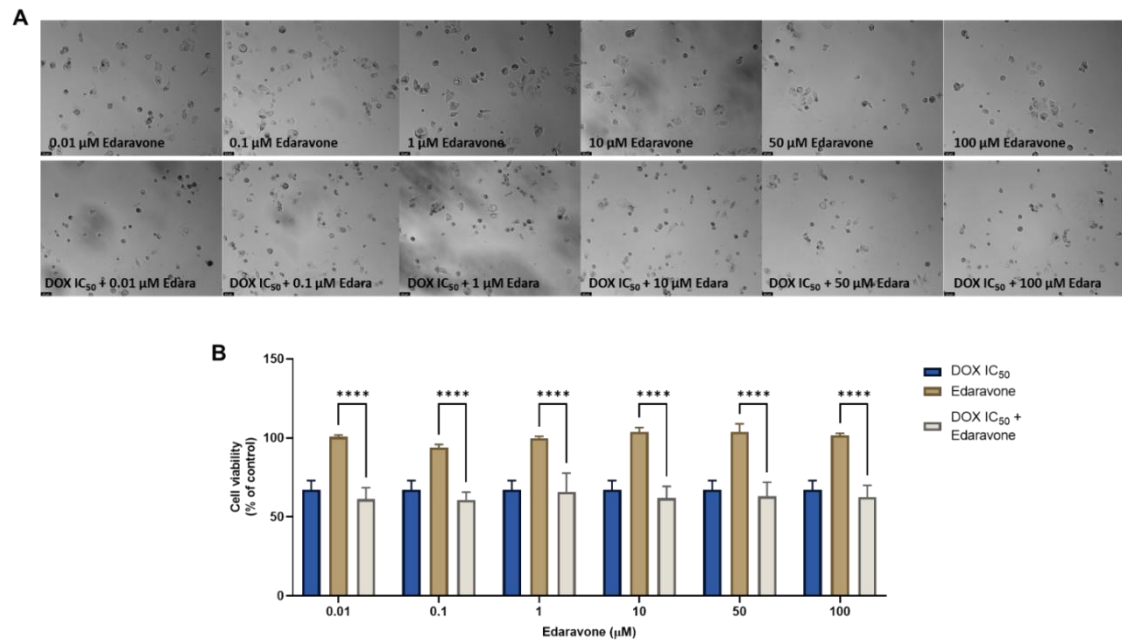

**Figure S2.** Morphological analysis (A) and cellular viability (B) results of MCF-7 cells after a single and combined treatment of DOX and edaravone. Cells were incubated with increasing concentrations of edaravone, alone and combined with a fixed concentration (IC<sub>50</sub>) of DOX for 48 h. Cell viability was evaluated using an MTT assay. Experiments were performed three times independently ( $n = 3$ ). \*\*\*\* indicate significant results at  $p < 0.0001$ .

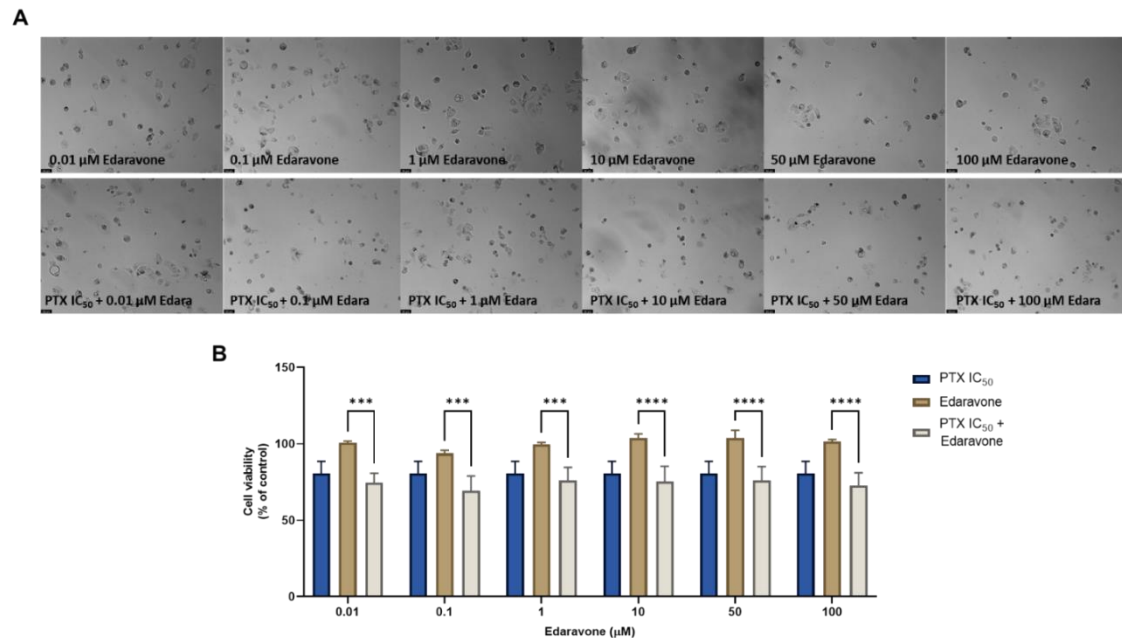

**Figure S3.** Morphological analysis (A) and cellular viability (B) results of MCF-7 cells after a single and combined treatment of PTX and edaravone. Cells were incubated with increasing concentrations of edaravone, alone and combined with a fixed concentration (IC<sub>50</sub>) of PTX for 48 h. Cell viability was evaluated using an MTT assay. Experiments were performed three times independently ( $n = 3$ ). \*\*\* and \*\*\*\* indicate significant results at  $p < 0.001$  and  $p < 0.0001$ , respectively.

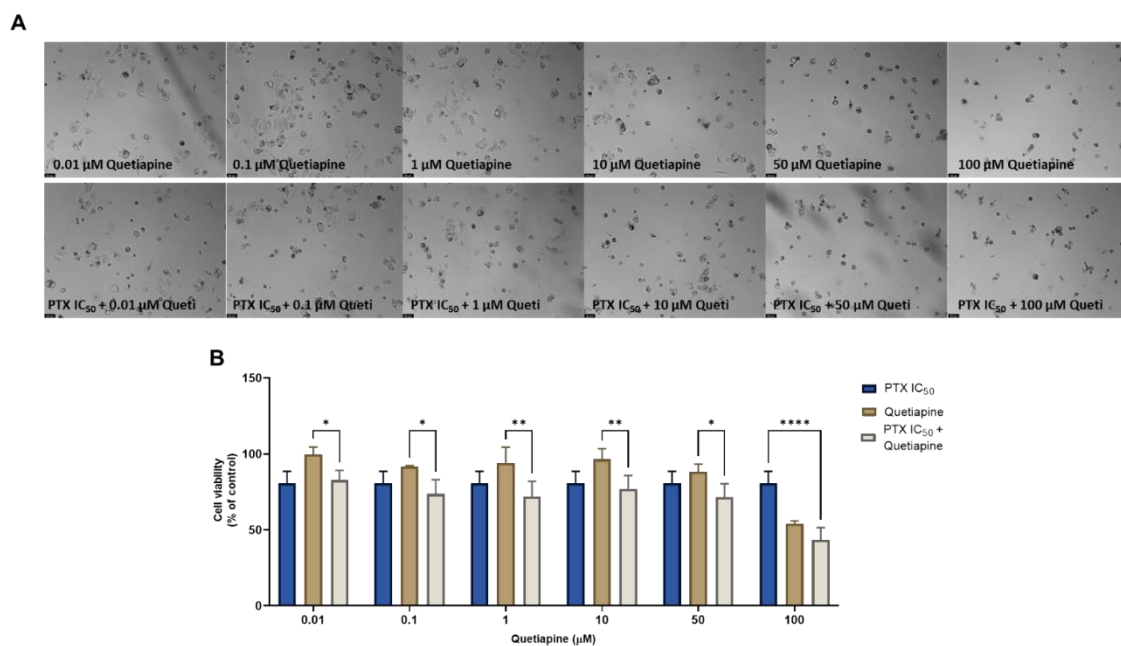

**Figure S4.** Morphological analysis (A) and cellular viability (B) results of MCF-7 cells after a single and combined treatment of PTX and quetiapine. Cells were incubated with increasing concentrations of quetiapine, alone and combined with a fixed concentration ( $\text{IC}_{50}$ ) of PTX for 48 h. Cell viability was evaluated using an MTT assay. Experiments were performed three times independently ( $n = 3$ ). \*, \*\* and \*\*\*\* indicate significant results at  $p < 0.05$ ,  $p < 0.01$  and  $p < 0.0001$ , respectively.

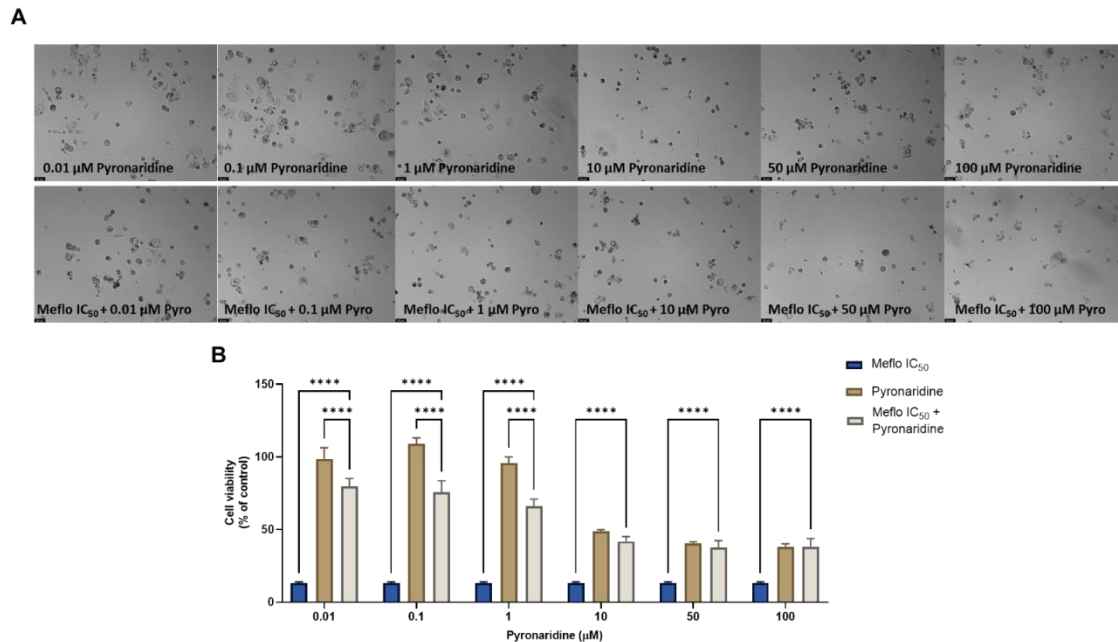

**Figure S5.** Morphological analysis (A) and cellular viability (B) results of MCF-7 cells after a single and combined treatment of mefloquine and pyronaridine. Cells were incubated with increasing concentrations of pyronaridine, alone and combined with a fixed concentration ( $\text{IC}_{50}$ ) of mefloquine for 48 h. Cell viability was evaluated using an MTT assay. Experiments were performed three times independently ( $n = 3$ ). \*\*\*\* indicate significant results at  $p < 0.0001$ .

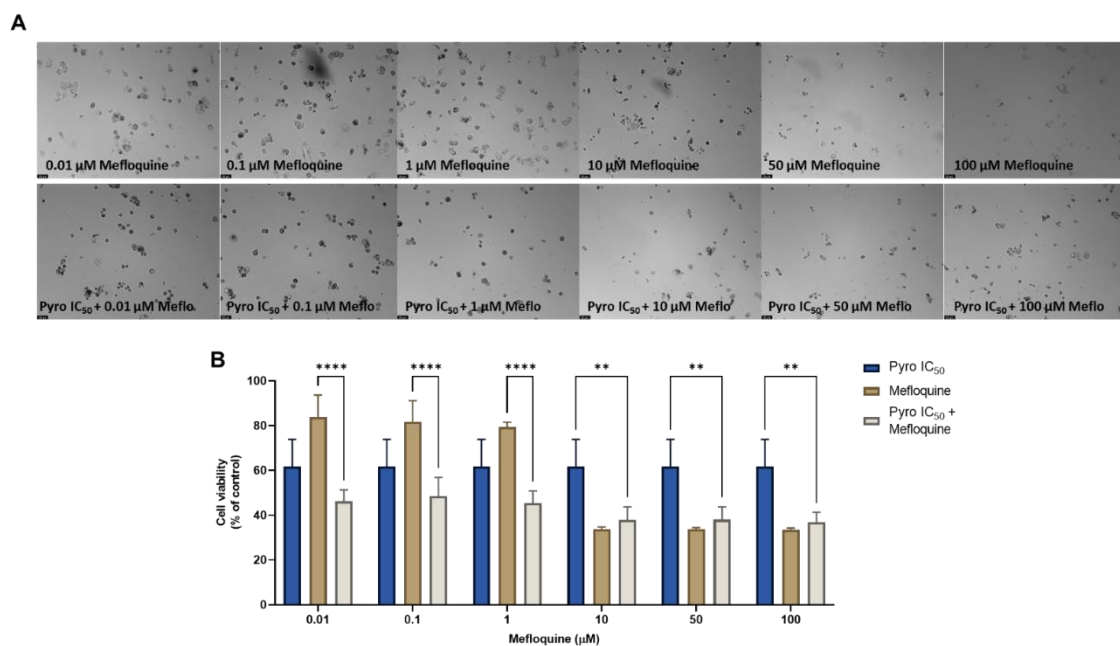

**Figure S6.** Morphological analysis (A) and cellular viability (B) results of MCF-7 cells after a single and combined treatment of pyronaridine and mefloquine. Cells were incubated with increasing concentrations of mefloquine, alone and combined with a fixed concentration ( $\text{IC}_{50}$ ) of pyronaridine for 48 h. Cell viability was evaluated using an MTT assay. Experiments were performed three times independently ( $n = 3$ ). \*\* and \*\*\*\* indicate significant results at  $p < 0.01$  and  $p < 0.0001$ , respectively.

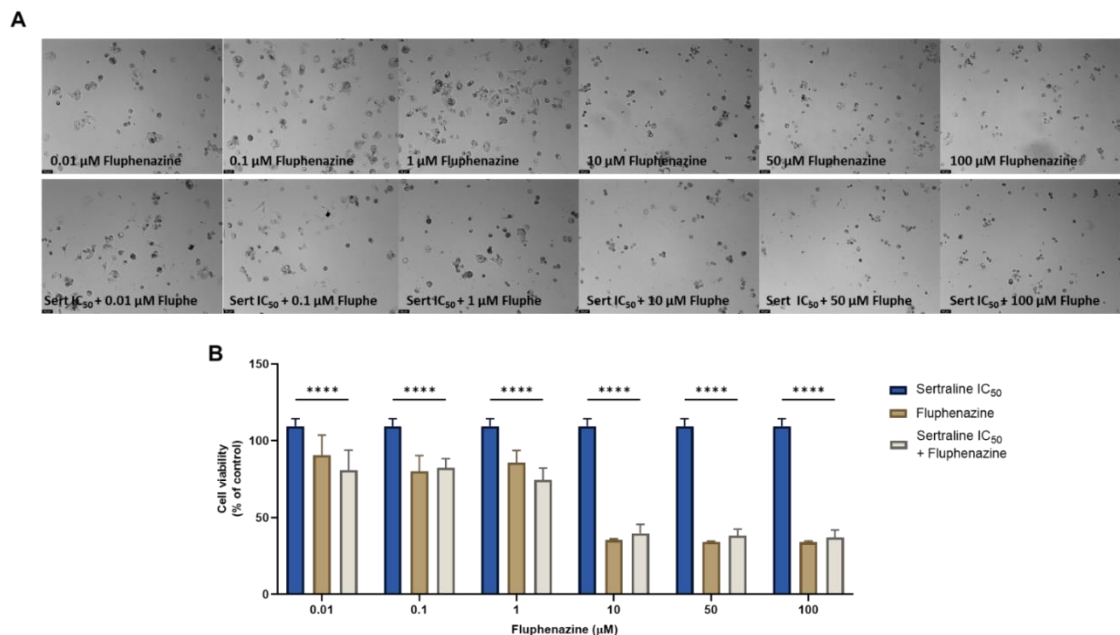

**Figure S7.** Morphological analysis (A) and cellular viability (B) results of MCF-7 cells after a single and combined treatment of fluphenazine and sertraline. Cells were incubated with increasing concentrations of fluphenazine, alone and combined with a fixed concentration ( $\text{IC}_{50}$ ) of sertraline for 48 h. Cell viability was evaluated using an MTT assay. Experiments were performed three times independently ( $n = 3$ ). \*\*\*\* indicate significant results at  $p < 0.0001$ .

A

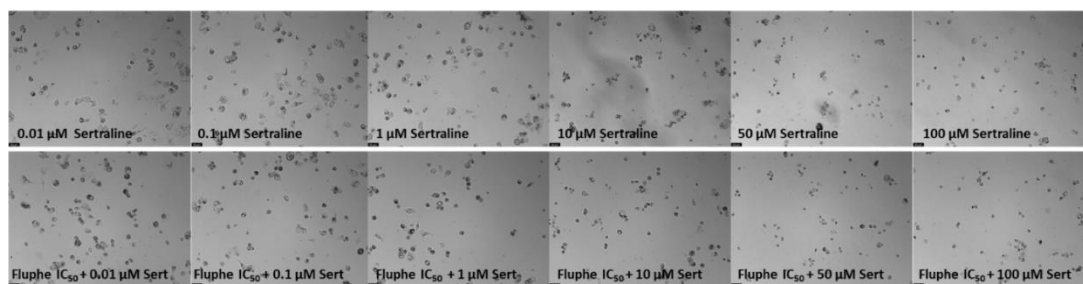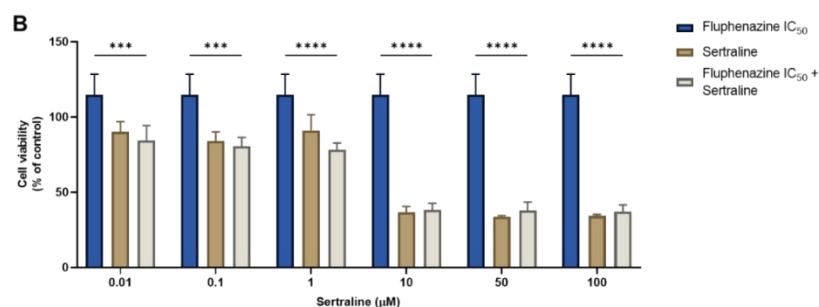

**Figure S8.** Morphological analysis (A) and cellular viability (B) results of MCF-7 cells after a single and combined treatment of sertraline and fluphenazine. Cells were incubated with increasing concentrations of sertraline, alone and combined with a fixed concentration (IC<sub>50</sub>) of fluphenazine for 48 h. Cell viability was evaluated using an MTT assay. Experiments were performed three times independently ( $n = 3$ ). \*\*\* and \*\*\*\* indicate significant results at  $p < 0.001$  and  $p < 0.0001$ , respectively.

A

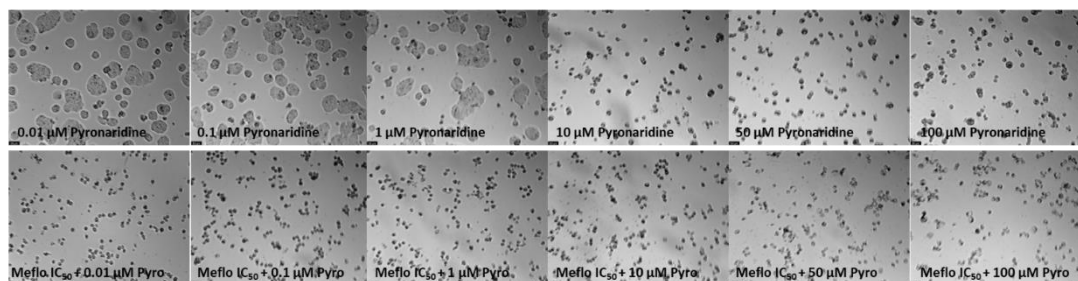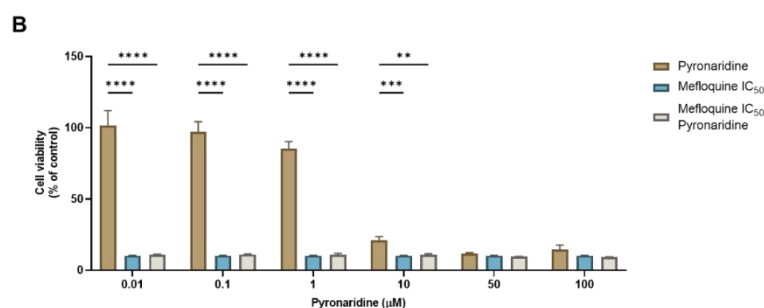

**Figure S9.** Morphological analysis (A) and cellular viability (B) results of HT-29 cells after a single and combined treatment of mefloquine and pyronaridine. Cells were incubated with increasing concentrations of pyronaridine, alone and combined with a fixed concentration (IC<sub>50</sub>) of mefloquine for 48 h. Cell viability was evaluated using an MTT assay. Experiments were performed three times independently ( $n = 3$ ). \*\*, \*\*\* and \*\*\*\* indicate significant results at  $p < 0.01$ ,  $p < 0.001$  and  $p < 0.0001$ , respectively.



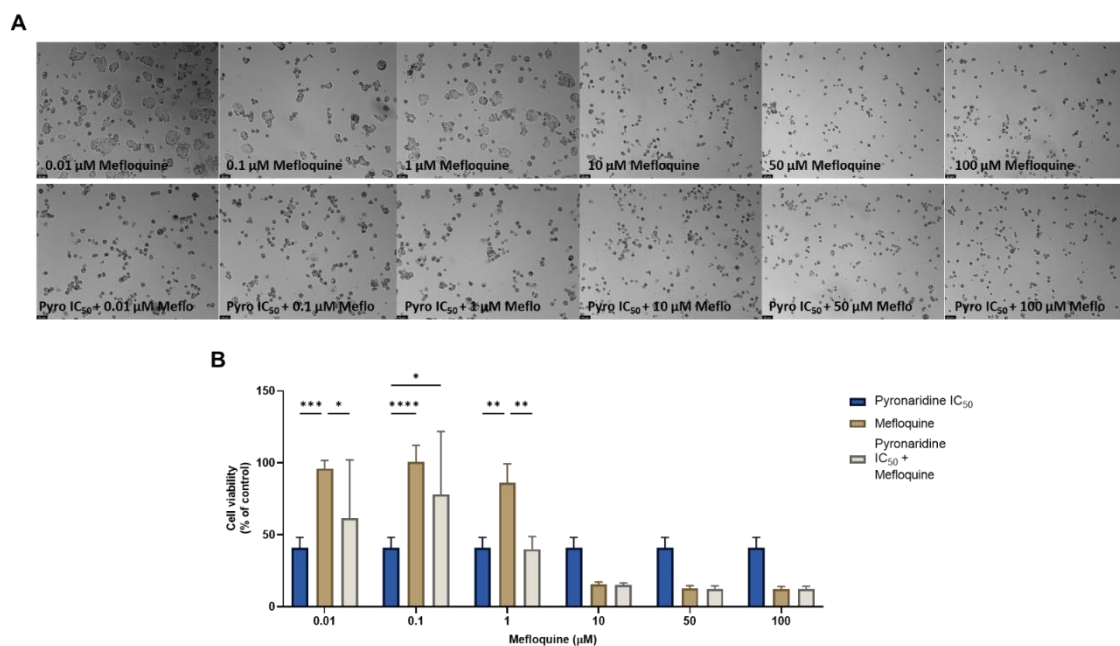

**Figure S10.** Morphological analysis (A) and cellular viability (B) results of HT-29 cells after a single and combined treatment of mefloquine and pyronaridine. Cells were incubated with increasing concentrations of mefloquine, alone and combined with a fixed concentration ( $\text{IC}_{50}$ ) of pyronaridine for 48 h. Cell viability was evaluated using an MTT assay. Experiments were performed three times independently ( $n = 3$ ). \*, \*\*, \*\*\* and \*\*\*\* indicate significant results at  $p < 0.05$ ,  $p < 0.01$ ,  $p < 0.001$  and  $p < 0.0001$ , respectively.

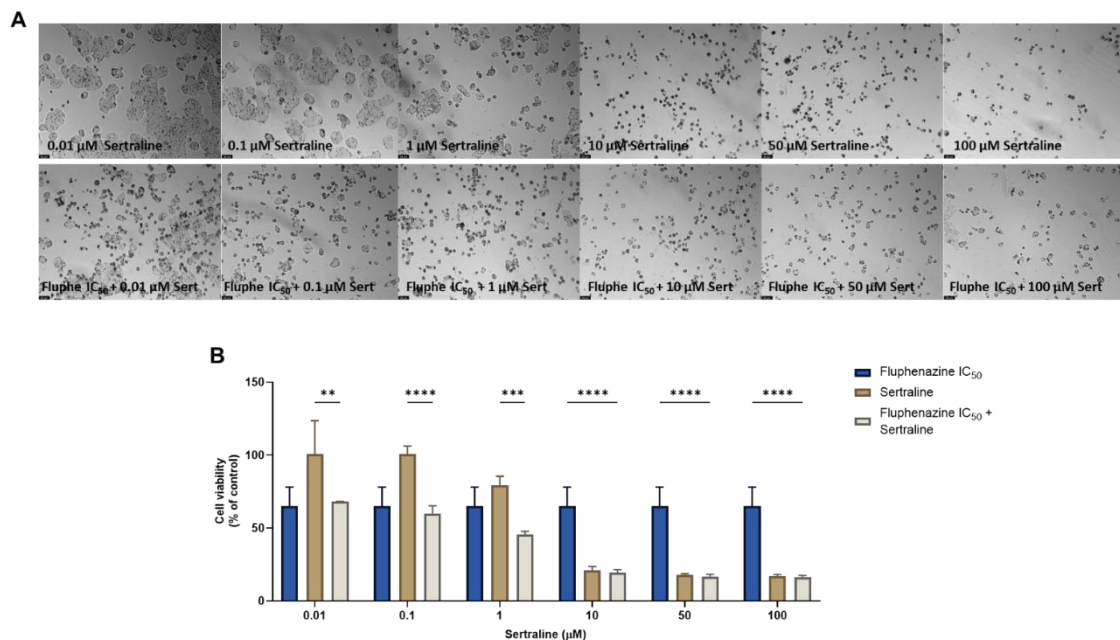

**Figure S11.** Morphological analysis (A) and cellular viability (B) results of HT-29 cells after a single and combined treatment of fluphenazine and sertraline. Cells were incubated with increasing concentrations of sertraline, alone and combined with a fixed concentration ( $\text{IC}_{50}$ ) of fluphenazine for 48 h. Cell viability was evaluated using an MTT assay. Experiments were performed three times independently ( $n = 3$ ). \*\*, \*\*\* and \*\*\*\* indicate significant results at  $p < 0.01$ ,  $p < 0.001$  and  $p < 0.0001$ , respectively.
